# Supplementary material for: Polyethersulfone (PES)/cellulose acetate butyrate (CAB) composite hollow fiber membranes for BTEX separation from produced water
Source: Royal Society of Chemistry journal article supplement (doi:10.1039/c5ra21185a), 2015-01-01
Supplement: c5ra21185a1.pdf [file c5ra21185a1.pdf]

## Supplementary Information

For

### Polyethersulfone (PES)/Cellulose Acetate Butyrate (CAB) Composite Hollow Fiber Membranes for BTEX Separation from Produced Water

Shangwen Zha <sup>a,b</sup>, Jianjia Yu <sup>a,\*</sup>, Guoyin Zhang <sup>a</sup>, Ning Liu <sup>a</sup> and Robert Lee <sup>a</sup>

<sup>a</sup>. Petroleum Recovery Research Center, New Mexico Institute of Mining and Technology, Socorro, NM 8780, United States.

<sup>b</sup>. Materials Engineering Department, New Mexico Institute of Mining and Technology, Socorro, NM, 87801, United States.

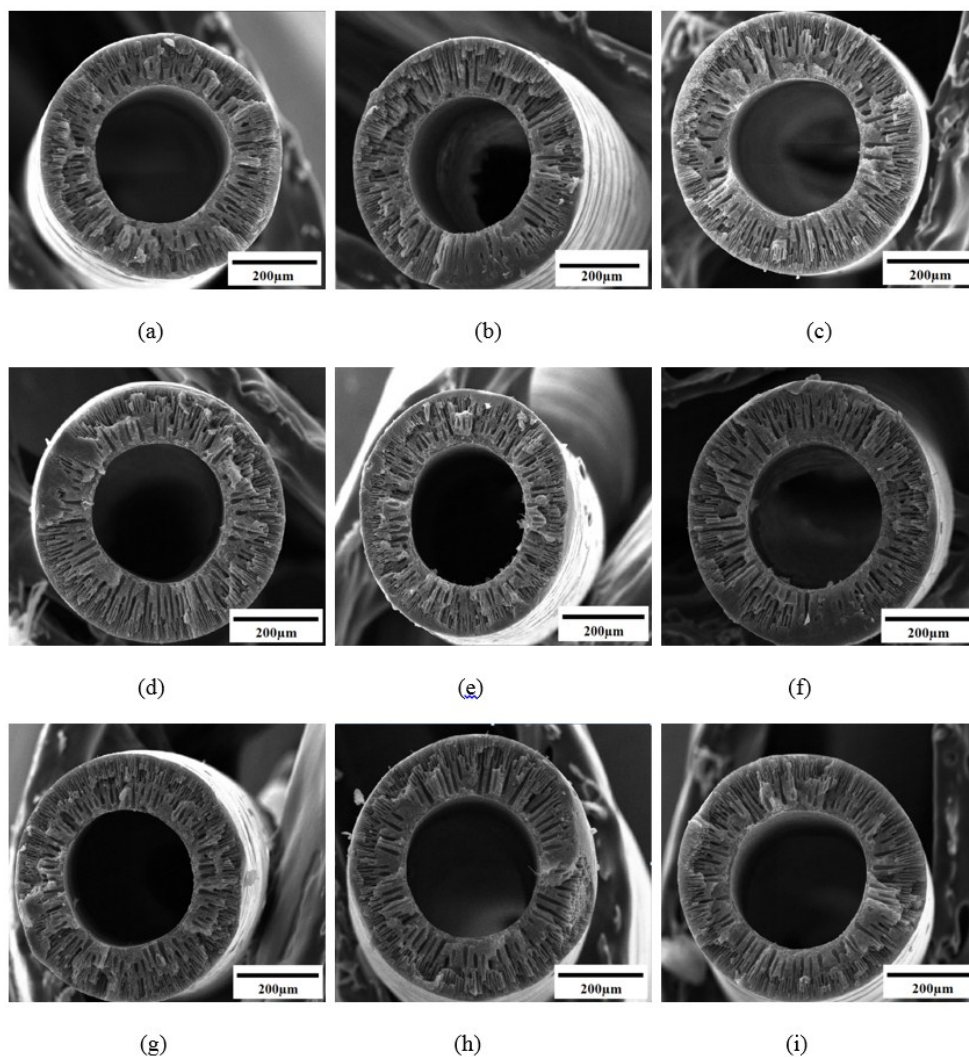

Fig. S1. Cross sectional images of all the composite PES/CAB hollow fiber membranes: (a) M1; (b) M2, (c) M3; (d) M4, (e) M5; (f) M6; (g) M7; (h) M8 and (i) M9.

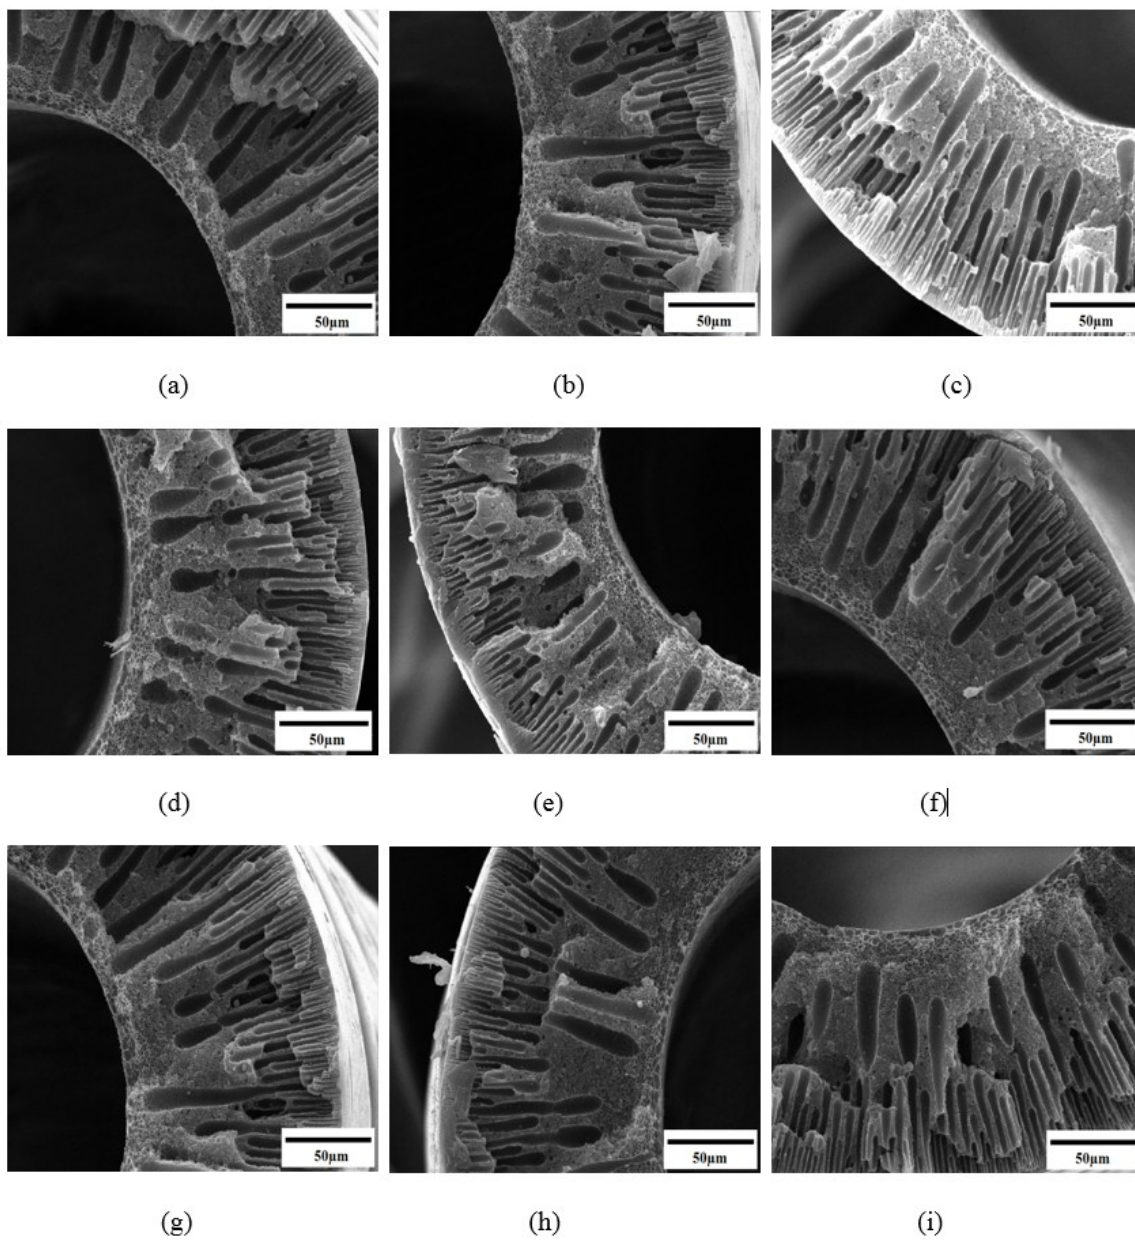

Fig. S2. Cross sectional images of all the composite PES/CAB hollow fiber membranes examined at a higher resolution (600×): (a) M1; (b) M2, (c) M3; (d) M4, (e) M5; (f) M6; (g) M7; (h) M8 and (i) M9.

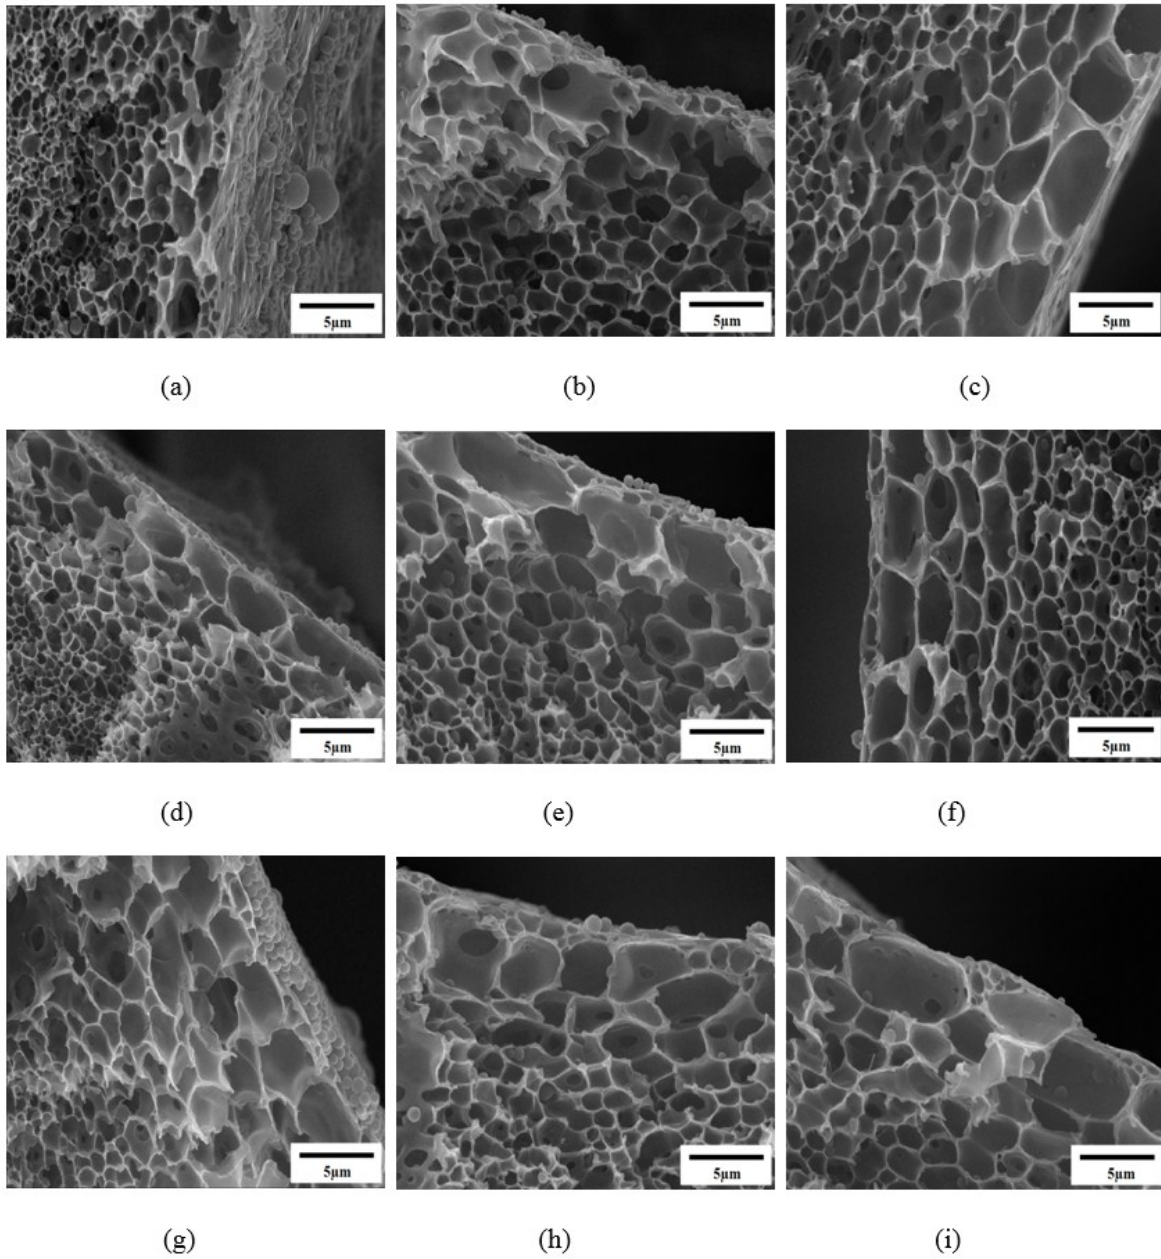

Fig. S3. Cross sectional images close to the inner surface of all the composite PES/CAB hollow fiber membranes examined at a high resolution (5000 $\times$ ): (a) M1; (b) M2, (c) M3; (d) M4, (e) M5; (f) M6; (g) M7; (h) M8 and (i) M9.

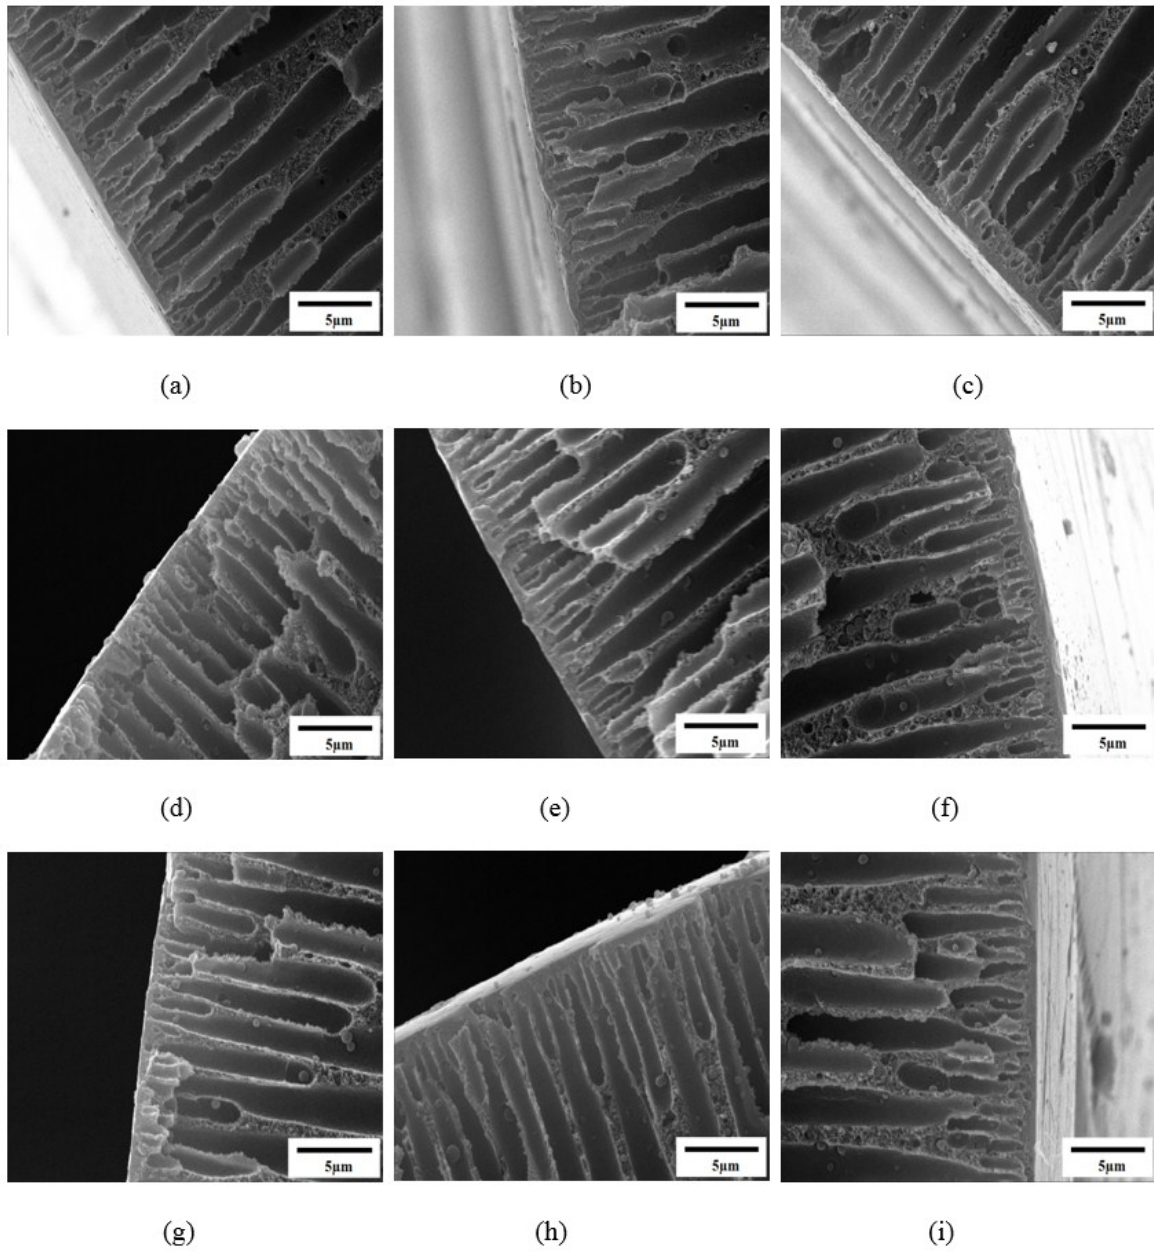

Fig. S4. Cross sectional images close to the outer surface of all the composite PES/CAB hollow fiber membranes examined at a high resolution (5000 $\times$ ): (a) M1; (b) M2, (c) M3; (d) M4, (e) M5; (f) M6; (g) M7; (h) M8 and (i) M9.
